# Supplementary material for: GRP78 regulates CD44v membrane homeostasis and cell spreading in tamoxifen-resistant breast cancer
Source: Life Sci Alliance. 2019 Aug 15;2(4):e201900377. doi: 10.26508/lsa.201900377 (PMC6696983; doi:10.26508/lsa.201900377)
Supplement: Supplementary file 6 [file LSA-2019-00377_TableS2.xlsx]

## Sheet: Table S2 Reagents
Table S2 The reagents used in the study
Application	Name	Catalog number	Supplier
Plasmid isolation	GeneJET Plasmid Maxiprep Kit	K0491	Thermo Scientific
Plasmid isolation	GeneJET Plasmid Midiprep Kit	K0481	Thermo Scientific
Plasmid isolation	GeneJET Plasmid Miniprep Kit	K0502	Thermo Scientific
PCR	Q5® High-Fidelity DNA Polymerase	M0491	New England Biolabs
Transfection	BioT	B01-01	Bioland
Transfection	Lipofectamine™ RNAiMAX Reagent	13778030	Thermo Scientific
Matrix for cell culture	Corning™ Collagen I, Rat	354236	Thermo Fisher Scientific
F-actin staining	Rhodamine Phalloidin	PHDR1	Cytoskeleton
F-actin staining	ActinGreen™ 488 ReadyProbes™ Reagent	R37110	Thermo Scientific
Protein extraction	Halt™ Protease and Phosphatase Inhibitor Single-Use Cocktail, EDTA-Free	78443	Thermo Scientific
Cell staining	Crystal violet solution	HT90132	Sigma-Aldrich
Protein staining	PageBlue™ Protein Staining Solution	24620	Thermo Scientific
GST pull-down	Pierce™ IP Lysis Buffer	87787	Thermo Scientific
Protein purification	Glutathione Sepharose® 4B	17-0756-01	GE Healthcare
Protein purification	TALON® Metal Affinity Resin	635501	Takara
Protein purification	Imidazole	I5513	Sigma-Aldrich
Immunostaining	VECTASHIELD Antifade Mounting Medium with DAPI	H-1200	Vector Laboratories
Immunostaining	Mouse on Mouse (M.O.M.™) Basic Kit	BMK-2202	Vector Laboratories
Cell culture medium	Corning™ DMEM with L-Glutamine, 4.5g/L Glucose and Sodium Pyruvate	MT10013CV	Thermo Fisher Scientific
Cell culture medium	Corning™ Dulbecco's Phosphate-Buffered Salt Solution	MT21031CV	Thermo Fisher Scientific
Cell culture medium	Corning™ cellgro™ RPMI 1640 Medium (Mod.) 1X without L-Glutamine and phenol red	MT17105CV	Thermo Fisher Scientific
Cell culture antibiotic agent	HyClone Amphotericin B (Fungizone) solution	SV30078.01	GE Healthcare
Cell culture serum	Charcoal-stripped Fetal Bovine Serum	F6765	Sigma-Aldrich
Cell culture supplement	(Z)-4-hydroxy Tamoxifen	14854	Cayman Chemical
