# Supplementary material for: GRP78 regulates CD44v membrane homeostasis and cell spreading in tamoxifen-resistant breast cancer
Source: Life Sci Alliance. 2019 Aug 15;2(4):e201900377. doi: 10.26508/lsa.201900377 (PMC6696983; doi:10.26508/lsa.201900377)
Supplement: Supplementary file 7 [file LSA-2019-00377_TableS3.xlsx]

## Sheet: Table S3 Oligonucleotides
Table S3 The oligonucleotides for cloning, siRNA and qRT-PCR
Name	Sequence 5'→3'
Primers for cloning expression plasmids
ECoRI-ER signal-PATagRFP-F	CCGGAATTCATGAAGCTCTCCCTGGTGGCCGCGATGCTGCTGCTGCTCAGCGCGGCGCGGGCCATGAGCGAGCTGATTAAGGAGAAC
SacII-PATagRFP-R	TCCCCGCGGATTAAGCTTGTGCCCCAGTTTGC
SacII-Linker-GRP78-F	TCCCCGCGGTCCGGAGCGGCCGCTGCAGGAGGCAGCCAAAAAGAGGAGGAGGACAAGAAGGAG
KpnI-GRP78-R	CGGGGTACCCTACAACTCATCTTTTTCTGCTGTATC
SacII-Linker-PAGFP-F	TCCCCGCGGTCCGGAGCGGCCGCTGCAGGAGGCAGCCAAAAAATGGTGAGCAAGGGCGAGGAG
KpnI-PAGFP-R	CGGGGTACCTTACTTGTACAGCTCGTCCATGC
ECoRI-CD44-FL-F	CCGGAATTCATGGACAAGTTTTGGTGGCACGCAGCCT
SacII-CD44-FL-R	TCCCCGCGGCACCCCAATCTTCATGTCCACATTCT
KpnI-CD44-F	CGGGGTACCATGGACAAGTTTTGGTGGCACGCAGCCT
ECoRI-6xHis-Linker-CD44-R	CCGGAATTCTTAATGGTGATGGTGATGGTGACCGCTGCCGCTACCCACCCCAATCTTCATGTCCACATTCT
siRNA
sictrl-sense	GAGAUCGUAUAGCAACGGUdTdT
siGrp78(1)-sense	GGAGCGCAUUGAUACUAGAdTdT
siGrp78(2)-sense	CUUAAGUCUCGAAUGUAAUdTdT
siCD44(1)-sense	UGUAACACCUACACCAUUAUCdTdT
siCD44(2)-sense	GUAUGACACAUAUUGCUUCTT
qRT-PCR
18S rRNA-F	GCTTAATTTGACTCAACACGGGA
18S rRNA-R	AGCTATCAATCTGTCAATCCTGTC
CD44t-F	TCCAACACCTCCCAGTATGACA
CD44t-R	GGCAGGTCTGTGACTGATGTACA
CD44s-F	AGCAGCGGCTCCTCCAGTGA
CD44s-R	CCCACTGGGGTGGAATGTGTCT
CD44v3-F	GCAGGCTGGGAGCCAAAT
CD44v3-R	GAGGTGTCTGTCTCTTTCATCTTCATT
CD44v6-F	GGAACAGTGGTTTGGCAACAG
CD44v6-R	TTGGGTGTTTGGCGATATCC
